# Supplementary material for: Bayesian hierarchical network autocorrelation models for estimating direct and indirect effects of peer hospitals on outcomes of hospitalized patients
Source: Springer Nature journal article supplement (doi:10.1007/s41109-024-00627-1), 2024-06-14
Supplement: 41109_2024_627_MOESM1_ESM.pdf [file 41109_2024_627_MOESM1_ESM.pdf]

# Bayesian Hierarchical Network Autocorrelation Models for Estimating Direct and Indirect Effects of Peer Hospitals on Outcomes of Hospitalized Patients

Guanqing Chen and A. James O'Malley

|                             |                                                                                                                                                                                               |          |
|-----------------------------|-----------------------------------------------------------------------------------------------------------------------------------------------------------------------------------------------|----------|
| <b>List of Tables</b> ..... |                                                                                                                                                                                               | <b>1</b> |
| S1 .....                    | Bias and mean squared error and 95% coverage rate of $\rho$ for the model 1 when the parameter space of $\rho$ in the prior is restricted to $(1/\lambda_{min}, 1/\lambda_{max})$ .           | 2        |
| S2 .....                    | Bias and mean squared error and 95% coverage rate of $\rho$ for the model 1 when the parameter space of $\rho$ in the prior is restricted to $(-1,1)$ .                                       | 3        |
| S3 .....                    | Bias and mean squared error and 95% coverage rate of $\rho$ for the model 1 when $p(\rho) \propto \frac{1}{(1/\lambda_{max}-\rho)(\rho-1/\lambda_{min})}$ .                                   | 4        |
| S4 .....                    | Bias, mean squared error and 95% coverage rate of $\rho$ and $\alpha$ for the model 2 when the parameter space of $\rho$ in the prior is restricted to $(1/\lambda_{min}, 1/\lambda_{max})$ . | 5        |
| S5 .....                    | Bias, mean squared error and 95% coverage rate of $\rho$ and $\alpha$ for the model 2 when the parameter space of $\rho$ in the prior is restricted to $(-1,1)$ .                             | 6        |
| S6 .....                    | Bias, mean squared error and 95% coverage rate of $\rho$ and $\alpha$ for the model 2 when $p(\rho) \propto \frac{1}{(1/\lambda_{max}-\rho)(\rho-1/\lambda_{min})}$ .                         | 7        |

Table 1. Bias, mean squared error (MSE) and 95% coverage rate (Rate) of  $\rho$  using  $U(1/\lambda_{\min}, 1/\lambda_{\max})$  prior.

| Network Density |      | $\rho = -0.5$ | $\rho = -0.2$ | $\rho = 0$ | $\rho = 0.2$ | $\rho = 0.5$ |
|-----------------|------|---------------|---------------|------------|--------------|--------------|
| 0.2             | Bias | 0.034         | 0.026         | 0.017      | 0.007        | -0.011       |
|                 | MSE  | 0.026         | 0.028         | 0.029      | 0.029        | 0.025        |
|                 | Rate | 0.944         | 0.94          | 0.946      | 0.956        | 0.946        |
| 0.4             | Bias | 0.020         | -0.019        | 0.010      | 0.010        | -0.053       |
|                 | MSE  | 0.069         | 0.071         | 0.077      | 0.069        | 0.058        |
|                 | Rate | 0.96          | 0.948         | 0.954      | 0.952        | 0.958        |
| 0.6             | Bias | 0.044         | 0.043         | 0.023      | -0.057       | -0.131       |
|                 | MSE  | 0.145         | 0.151         | 0.152      | 0.120        | 0.108        |
|                 | Rate | 0.972         | 0.966         | 0.958      | 0.972        | 0.96         |
| 0.8             | Bias | 0.025         | -0.091        | -0.133     | -0.172       | -0.298       |
|                 | MSE  | 0.346         | 0.290         | 0.272      | 0.270        | 0.263        |
|                 | Rate | 0.962         | 0.97          | 0.97       | 0.97         | 0.962        |

Note: The results are rounded to 3 decimal places.

Table S2. Bias, mean squared error (MSE) and 95% coverage rate (Rate) of  $\rho$  using  $U(-1,1)$  prior.

| Network Density |      | $\rho = -0.5$ | $\rho = -0.2$ | $\rho = 0$ | $\rho = 0.2$ | $\rho = 0.5$ |
|-----------------|------|---------------|---------------|------------|--------------|--------------|
| 0.2             | Bias | 0.023         | 0.024         | 0.006      | 0.007        | -0.011       |
|                 | MSE  | 0.025         | 0.029         | 0.027      | 0.029        | 0.025        |
|                 | Rate | 0.958         | 0.946         | 0.964      | 0.956        | 0.946        |
| 0.4             | Bias | 0.062         | 0.028         | 0.002      | -0.019       | -0.063       |
|                 | MSE  | 0.062         | 0.074         | 0.077      | 0.071        | 0.058        |
|                 | Rate | 0.96          | 0.964         | 0.944      | 0.956        | 0.962        |
| 0.6             | Bias | 0.151         | 0.062         | 0.007      | -0.024       | -0.152       |
|                 | MSE  | 0.127         | 0.115         | 0.126      | 0.104        | 0.120        |
|                 | Rate | 0.97          | 0.974         | 0.958      | 0.976        | 0.948        |
| 0.8             | Bias | 0.241         | 0.123         | 0.020      | -0.102       | -0.274       |
|                 | MSE  | 0.171         | 0.162         | 0.147      | 0.141        | 0.186        |
|                 | Rate | 0.988         | 0.978         | 0.986      | 0.988        | 0.966        |

Note: The results are rounded to 3 decimal places.

Table S3. Bias, mean squared error (MSE) and 95% coverage rate (Rate) of  $\rho$  using the transformed uniform prior that is proportional to  $\frac{1}{(1/\lambda_{max}-\rho)(\rho-1/\lambda_{min})}$  when  $\rho$  is the subject of the distribution.

| Network Density |      | $\rho = -0.5$ | $\rho = -0.2$ | $\rho = 0$ | $\rho = 0.2$ | $\rho = 0.5$ |
|-----------------|------|---------------|---------------|------------|--------------|--------------|
| 0.2             | Bias | 0.033         | 0.035         | 0.037      | 0.043        | 0.054        |
|                 | MSE  | 0.028         | 0.031         | 0.033      | 0.035        | 0.035        |
|                 | Rate | 0.942         | 0.934         | 0.930      | 0.924        | 0.916        |
| 0.4             | Bias | 0.048         | 0.068         | 0.086      | 0.101        | 0.074        |
|                 | MSE  | 0.088         | 0.103         | 0.109      | 0.107        | 0.068        |
|                 | Rate | 0.946         | 0.934         | 0.924      | 0.906        | 0.906        |
| 0.6             | Bias | 0.148         | 0.173         | 0.170      | 0.151        | 0.067        |
|                 | MSE  | 0.266         | 0.265         | 0.233      | 0.186        | 0.104        |
|                 | Rate | 0.920         | 0.912         | 0.916      | 0.920        | 0.944        |
| 0.8             | Bias | 0.312         | 0.283         | 0.233      | 0.165        | 0.026        |
|                 | MSE  | 0.591         | 0.475         | 0.377      | 0.278        | 0.161        |
|                 | Rate | 0.912         | 0.918         | 0.926      | 0.934        | 0.944        |

Note: The results are rounded to 3 decimal places.

Table S4. Bias, mean squared error (MSE) and 95% coverage rate (Rate) of  $\rho$  and  $\alpha$  using  $U(1/\lambda_{\min}, 1/\lambda_{\max})$  prior for  $\rho$ .

| Network Density |      | $\rho = -0.5$ |              | $\rho = -0.2$ |              | $\rho = 0$    |              | $\rho = 0.2$  |              | $\rho = 0.5$  |              |
|-----------------|------|---------------|--------------|---------------|--------------|---------------|--------------|---------------|--------------|---------------|--------------|
|                 |      | $\alpha = -2$ | $\alpha = 2$ | $\alpha = -2$ | $\alpha = 2$ | $\alpha = -2$ | $\alpha = 2$ | $\alpha = -2$ | $\alpha = 2$ | $\alpha = -2$ | $\alpha = 2$ |
| $d = 0.2$       | Bias | 0.045         | 0.07         | 0.005         | 0.024        | -0.005        | 0.01         | -0.049        | 0.002        | -0.082        | -0.061       |
|                 | MSE  | 0.049         | 0.068        | 0.052         | 0.059        | 0.06          | 0.053        | 0.063         | 0.049        | 0.062         | 0.046        |
|                 | Rate | 0.962         | 0.95         | 0.976         | 0.958        | 0.962         | 0.962        | 0.956         | 0.952        | 0.958         | 0.926        |
|                 | Bias | -0.009        | -0.021       | 0.002         | -0.011       | 0.006         | -0.004       | 0.02          | -0.005       | 0.04          | 0.016        |
|                 | MSE  | 0.012         | 0.007        | 0.012         | 0.007        | 0.011         | 0.006        | 0.011         | 0.007        | 0.016         | 0.008        |
|                 | Rate | 0.974         | 0.938        | 0.962         | 0.942        | 0.97          | 0.958        | 0.97          | 0.946        | 0.94          | 0.948        |
| $d = 0.4$       | Bias | 0.019         | 0.067        | -0.073        | -0.017       | -0.185        | -0.105       | -0.295        | -0.164       | -0.516        | -0.236       |
|                 | MSE  | 0.286         | 0.306        | 0.259         | 0.212        | 0.277         | 0.232        | 0.314         | 0.204        | 0.478         | 0.178        |
|                 | Rate | 0.96          | 0.97         | 0.978         | 0.98         | 0.984         | 0.972        | 0.96          | 0.952        | 0.942         | 0.928        |
|                 | Bias | 0.027         | -0.045       | 0.09          | 0.019        | 0.173         | 0.056        | 0.255         | 0.091        | 0.449         | 0.135        |
|                 | MSE  | 0.234         | 0.142        | 0.224         | 0.098        | 0.266         | 0.098        | 0.301         | 0.081        | 0.461         | 0.078        |
|                 | Rate | 0.944         | 0.966        | 0.96          | 0.972        | 0.956         | 0.974        | 0.954         | 0.958        | 0.894         | 0.934        |

Note: The results in blue font represent the results of  $\rho$  while the results in black font represent the results of  $\alpha$ . The results are rounded to 3 decimal places.

Table S5. Bias, mean squared error (MSE) and 95% coverage rate (Rate) of  $\rho$  and  $\alpha$  using  $U(-1,1)$  prior for  $\rho$ .

| Network Density |      | $\rho = -0.5$ |              | $\rho = -0.2$ |              | $\rho = 0$    |              | $\rho = 0.2$  |              | $\rho = 0.5$  |              |
|-----------------|------|---------------|--------------|---------------|--------------|---------------|--------------|---------------|--------------|---------------|--------------|
|                 |      | $\alpha = -2$ | $\alpha = 2$ | $\alpha = -2$ | $\alpha = 2$ | $\alpha = -2$ | $\alpha = 2$ | $\alpha = -2$ | $\alpha = 2$ | $\alpha = -2$ | $\alpha = 2$ |
| $d = 0.2$       | Bias | 0.054         | 0.062        | -0.001        | 0.049        | 0             | 0.009        | -0.044        | 0.022        | -0.054        | -0.029       |
|                 | MSE  | 0.045         | 0.05         | 0.054         | 0.057        | 0.053         | 0.05         | 0.065         | 0.055        | 0.059         | 0.037        |
|                 | Rate | 0.968         | 0.964        | 0.964         | 0.966        | 0.978         | 0.96         | 0.96          | 0.932        | 0.94          | 0.958        |
|                 | Bias | -0.017        | -0.012       | 0.006         | -0.01        | 0.009         | -0.004       | 0.017         | -0.008       | 0.026         | 0.002        |
|                 | MSE  | 0.012         | 0.006        | 0.012         | 0.008        | 0.011         | 0.007        | 0.014         | 0.008        | 0.011         | 0.007        |
|                 | Rate | 0.954         | 0.964        | 0.968         | 0.956        | 0.956         | 0.956        | 0.956         | 0.946        | 0.948         | 0.962        |
| $d = 0.4$       | Bias | 0.234         | 0.364        | 0.056         | 0.134        | -0.057        | 0.021        | -0.147        | -0.123       | -0.367        | -0.243       |
|                 | MSE  | 0.171         | 0.239        | 0.129         | 0.145        | 0.125         | 0.125        | 0.133         | 0.135        | 0.249         | 0.172        |
|                 | Rate | 0.982         | 0.984        | 0.994         | 0.984        | 0.986         | 0.984        | 0.986         | 0.98         | 0.952         | 0.914        |
|                 | Bias | -0.168        | -0.239       | -0.022        | -0.095       | 0.069         | -0.026       | 0.132         | 0.083        | 0.293         | 0.121        |
|                 | MSE  | 0.125         | 0.151        | 0.102         | 0.093        | 0.111         | 0.068        | 0.132         | 0.073        | 0.207         | 0.072        |
|                 | Rate | 0.962         | 0.968        | 0.99          | 0.978        | 0.974         | 0.978        | 0.972         | 0.968        | 0.96          | 0.956        |

Note: The results in blue font represent the results of  $\rho$  while the results in black font represent the results of  $\alpha$ . The results are rounded to 3 decimal places.

Table S6. Bias, mean squared error (MSE) and 95% coverage rate (Rate) of  $\rho$  using the transformed uniform prior that is proportional to  $\frac{1}{(1/\lambda_{max}-\rho)(\rho-1/\lambda_{min})}$  when  $\rho$  is the subject of the distribution .

| Network Density |      | $\rho = -0.5$ |              | $\rho = -0.2$ |              | $\rho = 0$    |              | $\rho = 0.2$  |              | $\rho = 0.5$  |              |
|-----------------|------|---------------|--------------|---------------|--------------|---------------|--------------|---------------|--------------|---------------|--------------|
|                 |      | $\alpha = -2$ | $\alpha = 2$ | $\alpha = -2$ | $\alpha = 2$ | $\alpha = -2$ | $\alpha = 2$ | $\alpha = -2$ | $\alpha = 2$ | $\alpha = -2$ | $\alpha = 2$ |
| $d = 0.2$       | Bias | 0.046         | 0.065        | 0.033         | 0.075        | 0.036         | 0.068        | 0.046         | 0.039        | 0.026         | 0.031        |
|                 | MSE  | 0.058         | 0.073        | 0.069         | 0.079        | 0.088         | 0.069        | 0.077         | 0.071        | 0.076         | 0.043        |
|                 | Rate | 0.954         | 0.942        | 0.95          | 0.94         | 0.934         | 0.934        | 0.95          | 0.912        | 0.91          | 0.918        |
|                 | Bias | -0.009        | -0.017       | -0.004        | -0.021       | -0.002        | -0.013       | 0.004         | -0.018       | 0.005         | -0.011       |
|                 | MSE  | 0.013         | 0.008        | 0.011         | 0.01         | 0.015         | 0.009        | 0.01          | 0.01         | 0.01          | 0.009        |
|                 | Rate | 0.966         | 0.936        | 0.962         | 0.948        | 0.942         | 0.96         | 0.964         | 0.932        | 0.926         | 0.964        |
| $d = 0.4$       | Bias | 0.135         | 0.376        | 0.15          | 0.246        | 0.028         | 0.17         | -0.036        | 0.079        | -0.13         | -0.043       |
|                 | MSE  | 0.442         | 0.635        | 0.405         | 0.47         | 0.398         | 0.294        | 0.407         | 0.223        | 0.361         | 0.119        |
|                 | Rate | 0.926         | 0.918        | 0.95          | 0.91         | 0.926         | 0.936        | 0.928         | 0.91         | 0.912         | 0.94         |
|                 | Bias | -0.029        | -0.238       | -0.038        | -0.166       | 0.043         | -0.122       | 0.122         | -0.036       | 0.178         | 0.027        |
|                 | MSE  | 0.269         | 0.295        | 0.258         | 0.221        | 0.293         | 0.149        | 0.353         | 0.108        | 0.353         | 0.069        |
|                 | Rate | 0.946         | 0.928        | 0.956         | 0.916        | 0.936         | 0.958        | 0.926         | 0.952        | 0.92          | 0.95         |

Note: The results in blue font represent the results of  $\rho$  while the results in black font represent the results of  $\alpha$ . The results are rounded to 3 decimal places.
